# Supplementary material for: Synthesis and Characterization of Mannosylated Formulations to Deliver a Minicircle DNA Vaccine
Source: MDPI journal article supplement (doi:10.3390/pharmaceutics13050673), 2021-05-07
Supplement: s1 [file s1]

# Supplementary Materials: Synthesis and Characterization of Mannosylated Formulations to Deliver a Minicircle DNA Vaccine

Ana Sofia Serra <sup>1</sup>, Dalinda Eusébio <sup>1</sup>, Ana Raquel Neves <sup>1</sup>, Himanshu Bhatt <sup>2</sup>, Swati Biswas <sup>2</sup>, Diana Costa <sup>1,\*</sup> and Ângela Sousa <sup>1,\*</sup>

**Citation:** Serra, A.S.; Eusébio, D.; Neves, A.R.; Albuquerque, T.; Bhatt, H.; Biswas, S.; Costa, D.; Sousa, Â. Synthesis and characterization of mannosylated formulations to deliver a minicircle DNA vaccine. *Pharmaceutics* **2021**, *13*, 673. <https://doi.org/10.3390/pharmaceutics13050673>

Academic Editor: Satoshi Uchida

Received: 7 April 2021

Accepted: 4 May 2021

Published: 7 May 2021

**Publisher's Note:** MDPI stays neutral with regard to jurisdictional claims in published maps and institutional affiliations.

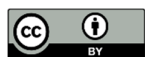

**Copyright:** © 2021 by the author. Licensee MDPI, Basel, Switzerland. This article is an open access article distributed under the terms and conditions of the Creative Commons Attribution (CC BY) license (<http://creativecommons.org/licenses/by/4.0/>).

## E7 protein

atgcatggagatacaccttacattgcatgaatatatgttagatttgcaaccagagacaact  
M H G D T P T L H E Y M L D L Q P E T T  
gatctctactggttatgagcaattaaatgacagctcagaggaggaggatgaaatagatggt  
D L Y C Y E Q L N D S S E E E D E I D G  
ccagctggacaagcagaaccggacagagcccattacaatattgtaaccttttggtgcaag  
P A G Q A E P D R A H Y N I V T F C C K  
tgtgactctacgcttcggttggtgcgtacaaagcacacacgtagacatttcgtactttggaa  
C D S T L R L C V Q S T H V D I R T L E  
gacctgttaatgggcacactaggaattgtgtgcccatctgttctcagaaccataa  
D L L M G T L G I V C P I C S Q K P -

(A)

**E7 protein** - H2P (CAT → CCT)  
 - C24G (TGT → GGT)  
 - E46A (GAA → GCA)

(B)

E7wt MHGDIPTLHEYMLDLQPETTDLYCYEQNLDSSEEEDEIDGPAQGAEPDRAHYNIVTFCK 60  
E7mutant MFGDPTLHEYMLDLQPETTDLYGYEQNLDSSEEEDEIDGPAQGAAPDRAHYNIVTFCK 60  
\* \* \* \* \*  
E7wt CDSTLRCLVQSTHVDIRTLEDLLMGTLGIVCPICSKQP- 98  
E7mutant CDSTLRCLVQSTHVDIRTLEDLLMGTLGIVCPICSKQP- 98  
\* \* \* \* \*

(C)

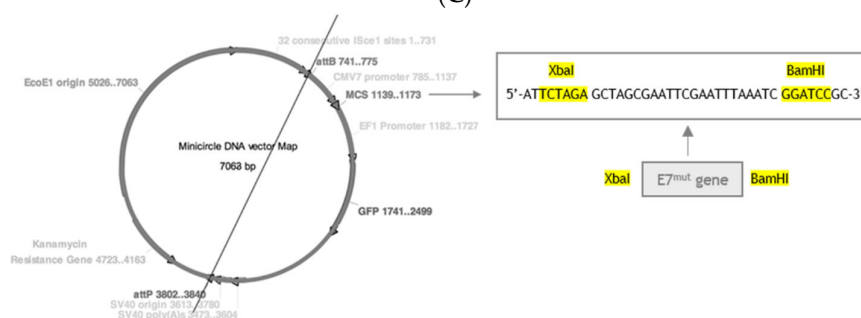

(D)

**Figure S1.** Schematic representation of three mutations in the HPV E7 gene and cloning of mutated gene in the parental plasmid vector. (A) E7 gene sequence from HPV wildtype; (B) Identification of three mutations to perform in the HPV E7 wildtype gene; (C) Sequencing of E7 mutant gene; (D) cloning of E7 mutant gene in the parental plasmid vector.

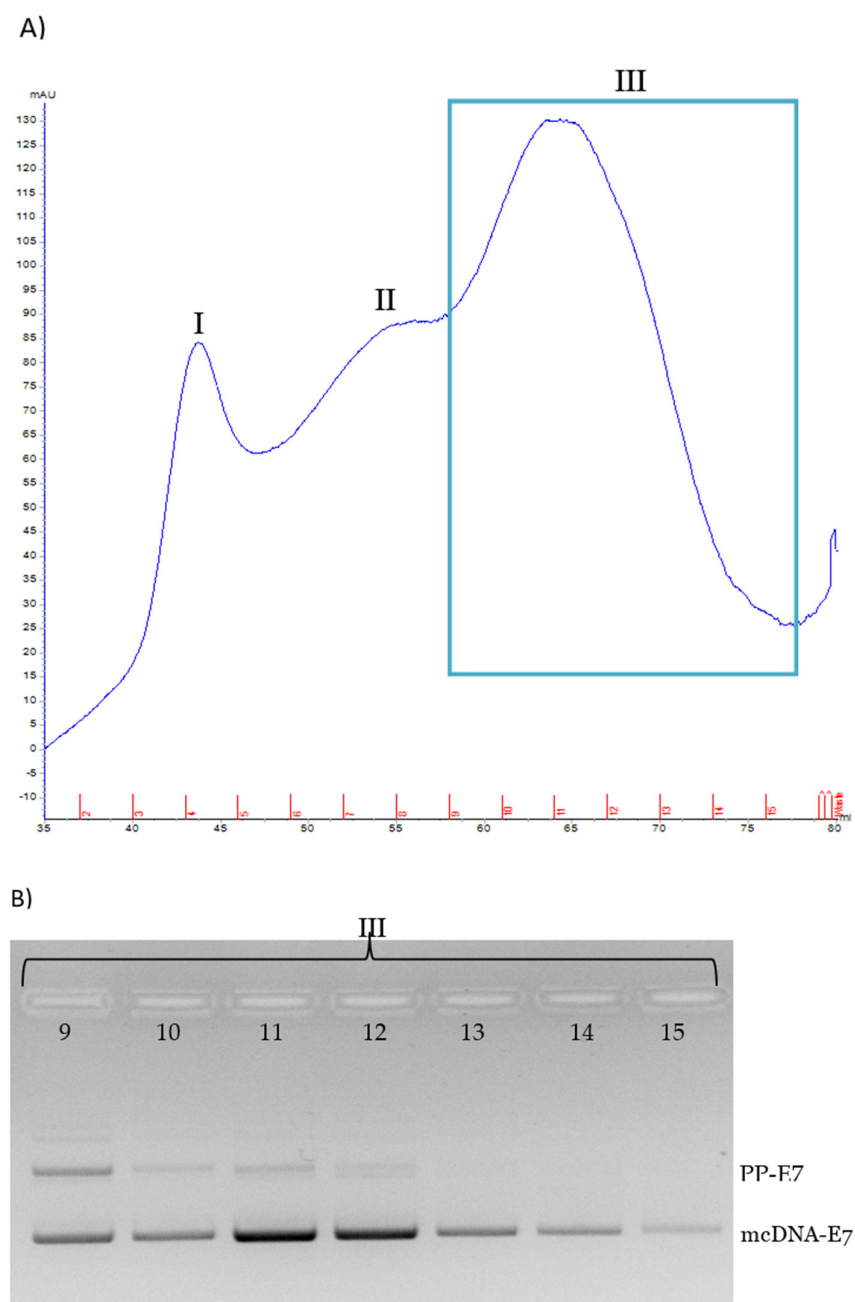

**Figure S2.** Chromatographic profile of mcDNA isolated by size exclusion chromatography in the Sephacryl SF-1000 column (A), using the following conditions, flow-rate of 0.3 mL/min, sample loading of 2 mL and fractionation of 3 mL; and agarose gel electrophoresis of fractions from peak III (B).

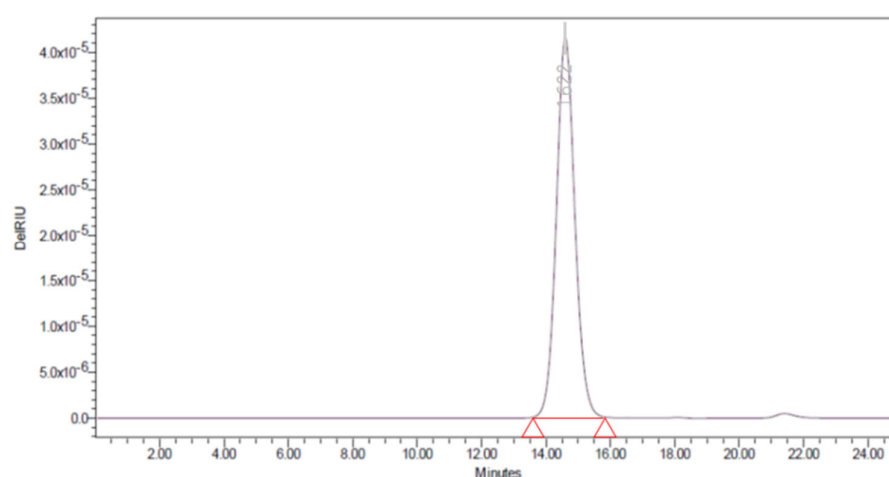

**Figure S3.** SEC chromatogram of MPITC-R8.

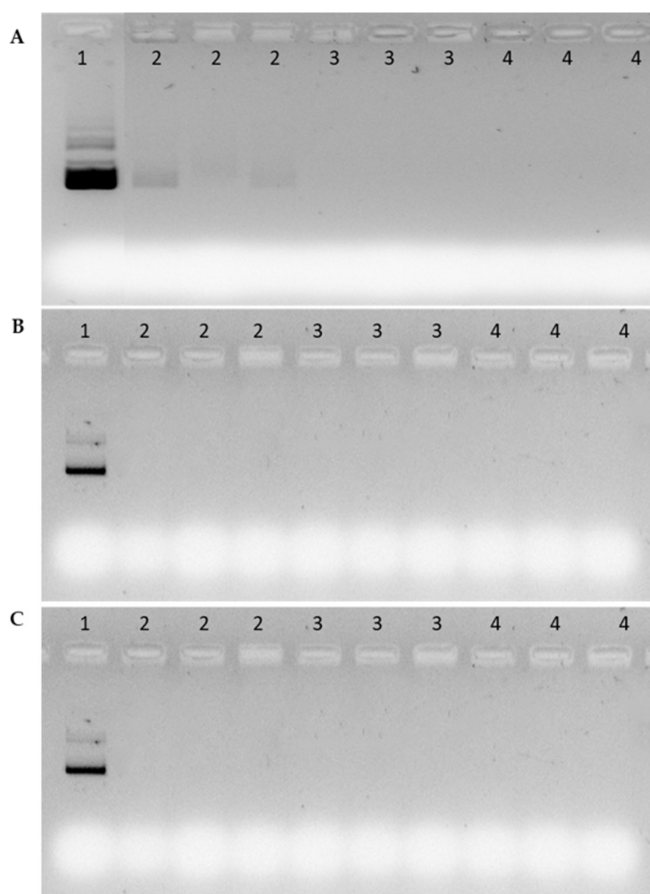

**Figure S4.** Electrophoretic mobility of supernatants from several formulations studied at various N/P ratios. (A) R8-mannose/mcDNA, (B) R8-mannose/PEI/mcDNA maintaining PEI N/P ratio at 5 and changing R8 N/P ratios and (C) R8-mannose/PEI/mcDNA maintaining PEI N/P ratio at 10 and changing R8 N/P ratios. Image A: lane 1-R8-mannose/mcDNA N/P ratio of 1:1; lane 2-R8-mannose/mcDNA N/P ratio of 1.5:1; lane 3-R8-mannose/mcDNA N/P ratio of 2:1. Image B: lane 1-R8-mannose/PEI/mcDNA N/P ratio of 1:5:1; lane 2-R8-mannose/PEI/mcDNA N/P ratio of 1.5:5:1; lane 3-R8-mannose/PEI/mcDNA N/P ratio of 2:5:1. Image C: lane 1-R8-mannose/PEI/mcDNA N/P ratio of 1:10:1; lane 2-R8-mannose/PEI/mcDNA N/P ratio of 1.5:10:1; lane 3-R8-mannose/PEI/mcDNA N/P ratio of 2:10:1.

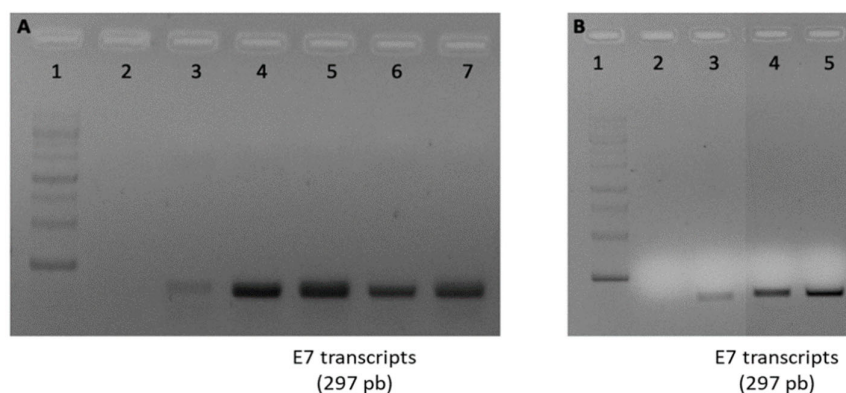

**Figure S5.** Analysis of RT-PCR products by agarose gel electrophoresis. Evaluation of E7 transcripts in Raw cells (**A**) and Fibro cells (**B**). Lane 1 - DNA molecular weight marker; lane 2- control without cDNA sample; lane 3-non-transfected cells; lane 4-cells transfected by PEI/mcDNA N/P ratio 5:1; lane 5-cells transfected by R8-mannose/PEI/mcDNA N/P ratio 2:5:1; lane 6-cells transfected by PEI/mcDNA N/P ratio 10:1; lane 7-cells transfected by R8-mannose/PEI/mcDNA N/P ratio 2:10:1.

**Table S1.** The molecular weight of each MPITC-R8 conjugate by SEC analysis.

| Conjugates | Observed Relative Molecular Weight (Mw) (Da) | Theoretical Molecular Weight (Da) |
|------------|----------------------------------------------|-----------------------------------|
| MPITC-R8   | 1622                                         | 1643                              |
